# Supplementary material
Source: PubMed Central journal article supplement (PMC7365549)
Supplement: ao0c02208_si_001.pdf [file ao0c02208_si_001.pdf]

## SUPPORTING INFORMATION

# Active Metabolite of Aeruginascin (4-Hydroxy-*N,N,N*-trimethyltryptamine): Synthesis, Structure, and Serotonergic Binding Affinity

*Andrew R. Chadeayne,<sup>\*,†</sup> Duyen N. K. Pham,<sup>‡</sup> Brian G. Reid,<sup>§</sup> James A. Golen,<sup>‡</sup> David R. Manke<sup>\*,‡</sup>*

<sup>†</sup> CaaMTech, Inc., 58 East Sunset Way, Suite 209, Issaquah, WA, 98027, USA

<sup>‡</sup> Department of Chemistry & Biochemistry, University of Massachusetts Dartmouth, 285 Old Westport Road, North Dartmouth, MA 02747, USA

<sup>§</sup> Canopy Growth USA, 35715 US Hwy 40, Suite D-102, Evergreen, CO, 80439, USA

## TABLE OF CONTENT

|                                                                                                                                                                                                                                                       |     |
|-------------------------------------------------------------------------------------------------------------------------------------------------------------------------------------------------------------------------------------------------------|-----|
| <b>Synthetic Procedure and Characterization of 4-AcO-TMT iodide.</b>                                                                                                                                                                                  | S3  |
| <b>Figure S1.</b> <sup>1</sup> H NMR of 4-AcO-TMT iodide in D <sub>2</sub> O.                                                                                                                                                                         | S4  |
| <b>Figure S2.</b> <sup>13</sup> C NMR of 4-AcO-TMT iodide in D <sub>2</sub> O.                                                                                                                                                                        | S4  |
| <b>Figure S3.</b> Fully labelled displacement ellipsoid representation (50%) of the asymmetric unit of 4-AcO-TMT iodide.                                                                                                                              | S5  |
| <b>X-Ray data collection and refinement details for 4-AcO-TMT iodide.</b>                                                                                                                                                                             | S5  |
| <b>Table S1.</b> Crystal data and structure refinement for 4-AcO-TMT iodide.                                                                                                                                                                          | S6  |
| <b>Table S2.</b> Fractional Atomic Coordinates ( $\times 10^4$ ) and Equivalent Isotropic Displacement Parameters ( $\text{\AA}^2 \times 10^3$ ) for 4-AcO-TMT iodide. $U_{eq}$ is defined as 1/3 of the trace of the orthogonalised $U_{ij}$ tensor. | S7  |
| <b>Table S3.</b> Anisotropic Displacement Parameters ( $\text{\AA}^2 \times 10^3$ ) for 4-AcO-TMT iodide. The Anisotropic displacement factor exponent takes the form: $2\pi^2[h^2a^*2U_{11}+2hka^*b^*U_{12}+\dots]$ .                                | S8  |
| <b>Table S4.</b> Bond Lengths for 4-AcO-TMT iodide.                                                                                                                                                                                                   | S8  |
| <b>Table S5.</b> Bond Angles for 4-AcO-TMT iodide.                                                                                                                                                                                                    | S9  |
| <b>Table S6.</b> Hydrogen Bonds for 4-AcO-TMT iodide.                                                                                                                                                                                                 | S9  |
| <b>Table S7.</b> Torsion Angles for 4-AcO-TMT iodide.                                                                                                                                                                                                 | S10 |
| <b>Table S8.</b> Hydrogen Atom Coordinates ( $\text{\AA} \times 10^4$ ) and Isotropic Displacement Parameters ( $\text{\AA}^2 \times 10^3$ ) for 4-HO-TMT iodide.                                                                                     | S11 |
| <b>Synthetic Procedure and Characterization of 4-HO-TMT iodide.</b>                                                                                                                                                                                   | S12 |
| <b>Figure S4.</b> <sup>1</sup> H NMR of 4-HO-TMT iodide in D <sub>2</sub> O                                                                                                                                                                           | S13 |
| <b>Figure S5.</b> <sup>13</sup> C NMR of 4-HO-TMT iodide in D <sub>2</sub> O                                                                                                                                                                          | S13 |
| <b>Figure S6.</b> Fully labelled displacement ellipsoid representation (50%) of the asymmetric unit of 4-HO-TMT iodide.                                                                                                                               | S14 |
| <b>X-Ray data collection and refinement details for 4-AcO-TMT iodide.</b>                                                                                                                                                                             | S14 |
| <b>Table S9.</b> Crystal data and structure refinement for 4-HO-TMT iodide.                                                                                                                                                                           | S15 |
| <b>Table S10.</b> Fractional Atomic Coordinates ( $\times 10^4$ ) and Equivalent Isotropic Displacement Parameters ( $\text{\AA}^2 \times 10^3$ ) for 4-HO-TMT iodide. $U_{eq}$ is defined as 1/3 of the trace of the orthogonalised $U_{ij}$ tensor. | S16 |
| <b>Table S11.</b> Anisotropic Displacement Parameters ( $\text{\AA}^2 \times 10^3$ ) for 4-HO-TMT iodide. The Anisotropic displacement factor exponent takes the form: $2\pi^2[h^2a^*2U_{11}+2hka^*b^*U_{12}+\dots]$ .                                | S17 |
| <b>Table S12.</b> Bond Lengths for 4-HO-TMT iodide.                                                                                                                                                                                                   | S17 |
| <b>Table S13.</b> Bond Angles for 4-HO-TMT iodide.                                                                                                                                                                                                    | S18 |
| <b>Table S14.</b> Torsion Angles for 4-HO-TMT iodide.                                                                                                                                                                                                 | S18 |
| <b>Table S15.</b> Hydrogen Atom Coordinates ( $\text{\AA} \times 10^4$ ) and Isotropic Displacement Parameters ( $\text{\AA}^2 \times 10^3$ ) for 4-HO-TMT iodide.                                                                                    | S19 |
| <b>Description of Cellular Assays</b>                                                                                                                                                                                                                 | S20 |
| <b>In Vitro Pharmacology: Binding Assays</b>                                                                                                                                                                                                          | S21 |
| <b>References</b>                                                                                                                                                                                                                                     | S27 |

### Synthetic Procedure and Characterization of 4-AcO-TMT iodide.

250 mg of a commercial sample of 4-acetoxy-*N,N*-dimethyltryptammonium (4-AcO-DMT) fumarate (the Indole Shop) was dissolved in 10 mL of methanol in a 50 mL round bottom flask, and 10 mL of iodomethane was then added. The mixture was stirred for 24 hours under an atmosphere of nitrogen. The solvent was removed *in vacuo*. The resulting powder was washed with diethyl ether and filtered to yield 313 mg of yellow powder. This powder was dissolved in 75 mL of acetone. The solution was heated with stirring and reduced in volume to 40 mL. The mixture was cooled in an ice bath, producing a white precipitate. The powder was filtered to yield 142 mg of white powder (53.0 % yield). <sup>1</sup>H NMR (400 MHz, D<sub>2</sub>O): δ 7.46 (d, *J* = 8.6 Hz, 1 H, ArH), 7.34 (s, 1 H, ArH), 7.26 (t, *J* = 7.8 Hz, 1 H, ArH), 6.95 (d, *J* = 8.3 Hz, 1 H, ArH) 3.63 (t, *J* = 7.9 Hz, 2 H, CH<sub>2</sub>), 3.28 (t, *J* = 8.0 Hz, 2 H, CH<sub>2</sub>), 3.21 (s, 9 H, CH<sub>3</sub>), 2.47 (s, 3 H, C(O)CH<sub>3</sub>); <sup>13</sup>C NMR (100 MHz, D<sub>2</sub>O): δ 174.32 (C=O), 143.59 (ArC), 139.28 (ArC), 125.82 (ArC), 123.01 (ArC), 119.11 (ArC), 112.92 (ArC), 111.13 (ArC), 107.32 (ArC), 67.64 (NCH<sub>2</sub>), 53.73 (NCH<sub>3</sub>), 21.25 (CH<sub>2</sub>), 20.48 (C(O)CH<sub>3</sub>). Elemental analysis calcd. for C<sub>15</sub>H<sub>21</sub>N<sub>2</sub>O<sub>2</sub>I: C 46.40, H 5.45, N 7.22; Found: C 46.17, H 5.35, N 7.11.

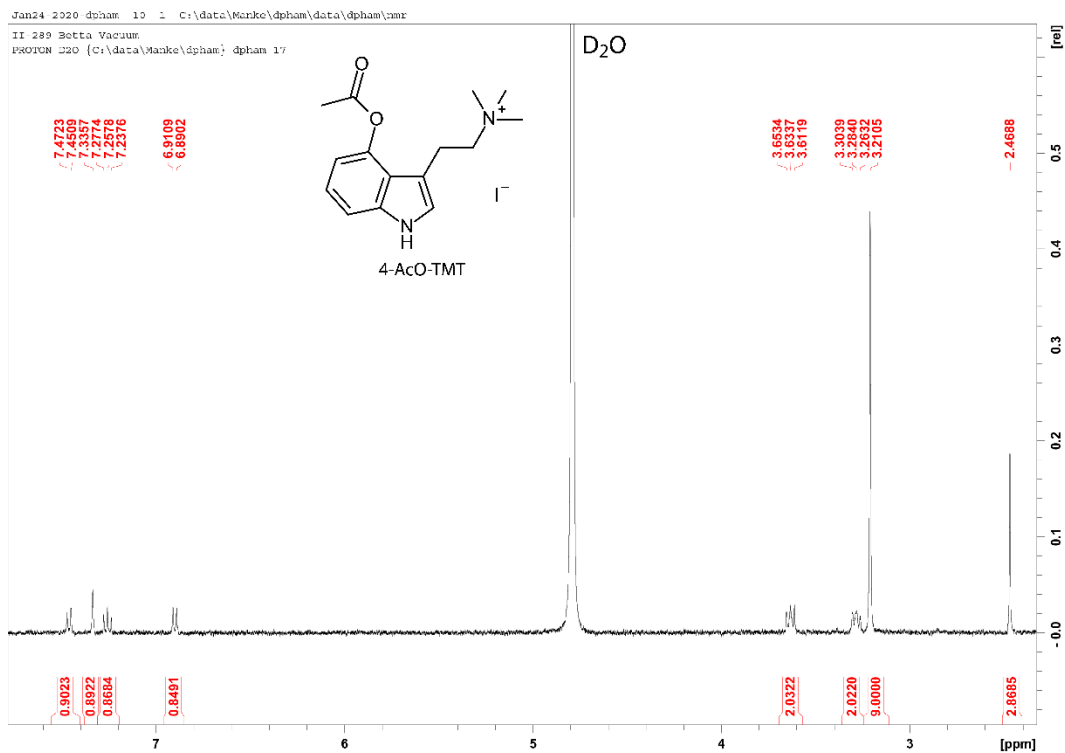

Figure S1. <sup>1</sup>H NMR of 4-AcO-TMT iodide in D<sub>2</sub>O

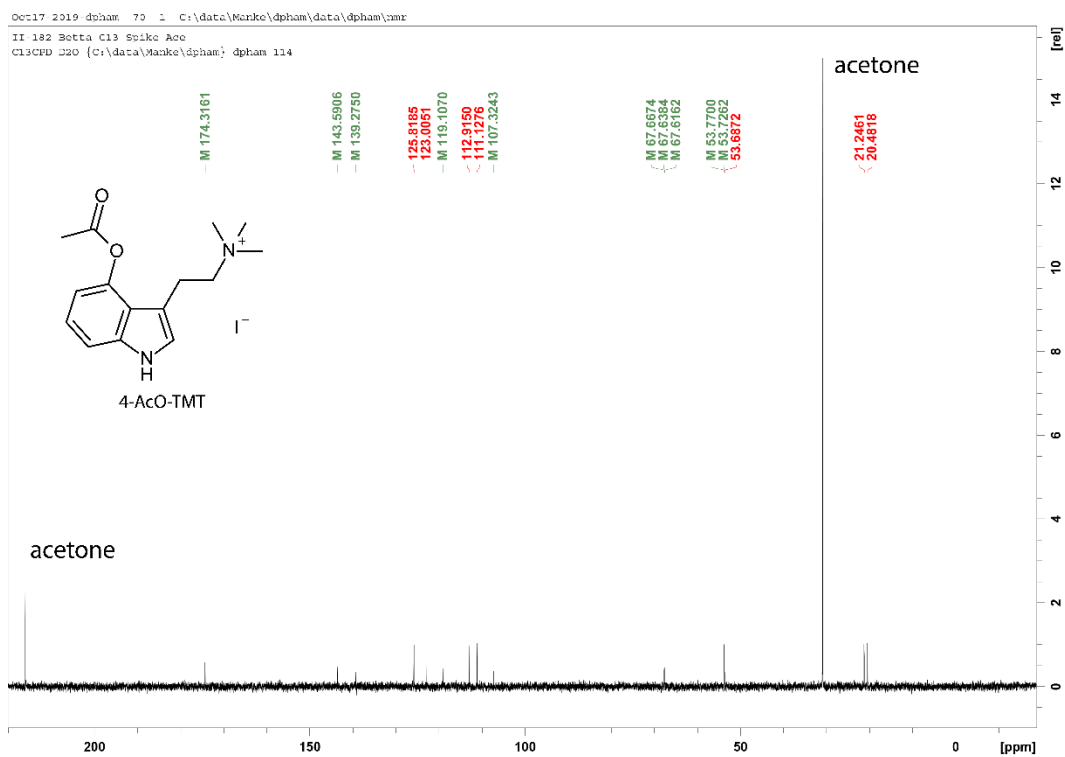

Figure S2. <sup>13</sup>C NMR of 4-AcO-TMT iodide in D<sub>2</sub>O (referenced with an acetone internal standard)

**Figure S3.** Fully labelled displacement ellipsoid representation (50%) of the asymmetric unit of 4-AcO-TMT iodide.

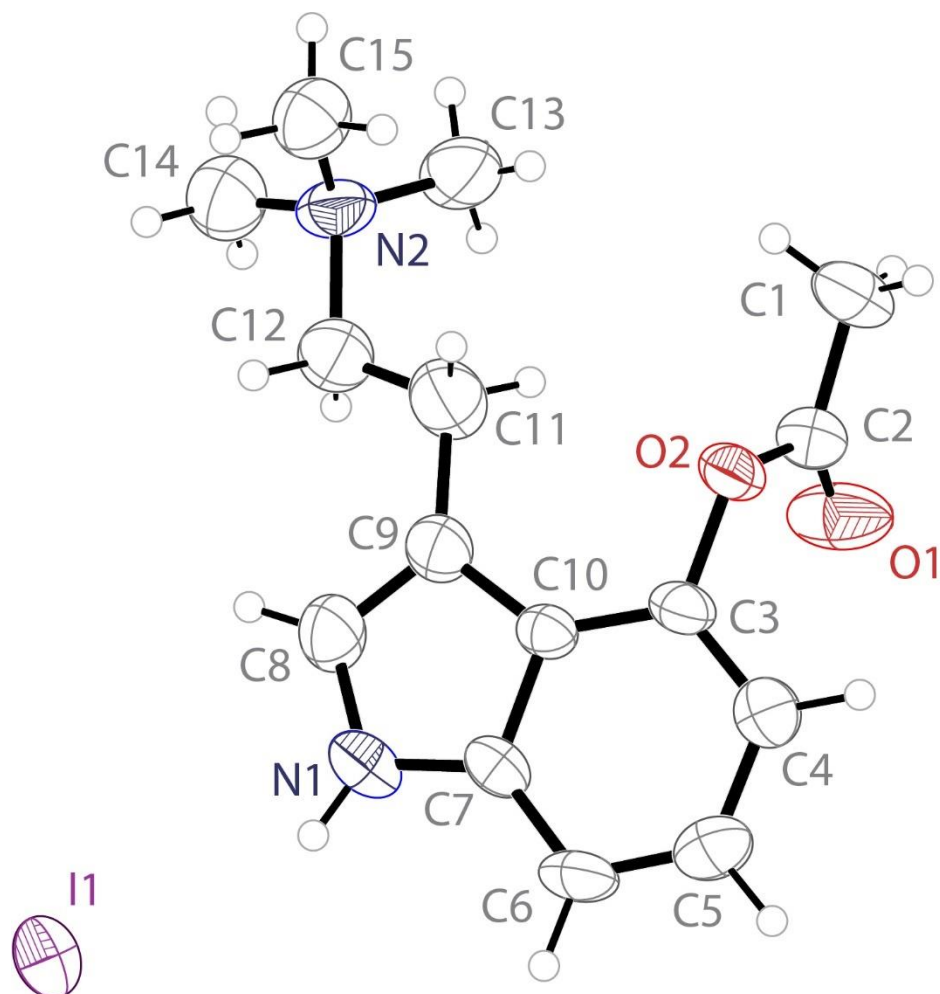

**X-Ray data collection and refinement details for 4-AcO-TMT iodide.** Crystals suitable for X-ray diffraction studies were grown from the slow evaporation of an aqueous solution. All operations were performed on a Bruker D8 Venture CMOS diffractometer, using Mo K $\alpha$  radiation with a TRIUMPH monochromator at a temperature of 298 K. Data collection was carried out using the Bruker APEX3 software. Cell refinement and data reduction were performed with the SAINT program.<sup>1</sup> The structure solution was done with SHELXS<sup>2</sup> and structure refinement was performed with SHELXL.<sup>3</sup> Further refinement and molecular graphics were generated using the OLEX2 and Mercury CSD software.<sup>4,5</sup>

All non-hydrogen atoms were refined anisotropically (XL) by full matrix least squares on  $F^2$ . Hydrogen atom H1 was found from a Fourier difference map, and refined with a fixed distance of 0.87 Å. Isotropic displacement parameters were set to 1.20 times  $U_{eq}$  of the parent N atoms. The remaining hydrogen atoms were placed in calculated positions and then refined with a riding model with C–H lengths of 0.93 Å ( $sp^2$ ), 0.96 Å ( $CH_3$ ) and 0.97 Å ( $CH_2$ ) with isotropic displacement parameters set to 1.20 ( $sp^2$  and  $CH_2$ ) and 1.50 ( $CH_3$ ) times  $U_{eq}$  of the parent C atom. Further details are in the tables below, and the final CIF is available as supporting material.

**Table S1.** Crystal data and structure refinement for 4-AcO-TMT iodide.

|                                                              |                                                                              |
|--------------------------------------------------------------|------------------------------------------------------------------------------|
| Identification code                                          | UMD1786B_b                                                                   |
| Empirical formula                                            | C <sub>15</sub> H <sub>21</sub> IN <sub>2</sub> O <sub>2</sub>               |
| Formula weight                                               | 388.24                                                                       |
| Temperature/K                                                | 299.05                                                                       |
| Crystal system                                               | monoclinic                                                                   |
| Space group                                                  | <i>P</i> 2 <sub>1</sub>                                                      |
| <i>a</i> /Å                                                  | 7.8459(9)                                                                    |
| <i>b</i> /Å                                                  | 9.8098(12)                                                                   |
| <i>c</i> /Å                                                  | 11.0823(12)                                                                  |
| $\alpha$ /°                                                  | 90                                                                           |
| $\beta$ /°                                                   | 101.069(3)                                                                   |
| $\gamma$ /°                                                  | 90                                                                           |
| Volume/Å <sup>3</sup>                                        | 837.10(17)                                                                   |
| <i>Z</i>                                                     | 2                                                                            |
| $\rho_{\text{calc}}$ /cm <sup>3</sup>                        | 1.540                                                                        |
| $\mu$ /mm <sup>-1</sup>                                      | 1.916                                                                        |
| <i>F</i> (000)                                               | 388.0                                                                        |
| Crystal size/mm <sup>3</sup>                                 | 0.2 × 0.1 × 0.05                                                             |
| Radiation                                                    | MoK $\alpha$ ( $\lambda$ = 0.71073)                                          |
| 2 $\Theta$ range for data collection/°                       | 5.866 to 50.852                                                              |
| Index ranges                                                 | -9 ≤ <i>h</i> ≤ 9, -11 ≤ <i>k</i> ≤ 11, -13 ≤ <i>l</i> ≤ 13                  |
| Reflections collected                                        | 18328                                                                        |
| Independent reflections                                      | 3076 [ <i>R</i> <sub>int</sub> = 0.0424, <i>R</i> <sub>sigma</sub> = 0.0298] |
| Data/restraints/parameters                                   | 3076/2/189                                                                   |
| Goodness-of-fit on <i>F</i> <sup>2</sup>                     | 1.064                                                                        |
| Final <i>R</i> indexes [ <i>I</i> ≥ 2 $\sigma$ ( <i>I</i> )] | <i>R</i> <sub>1</sub> = 0.0300, <i>wR</i> <sub>2</sub> = 0.0548              |
| Final <i>R</i> indexes [all data]                            | <i>R</i> <sub>1</sub> = 0.0396, <i>wR</i> <sub>2</sub> = 0.0583              |
| Largest diff. peak/hole / e Å <sup>-3</sup>                  | 0.51/-0.40                                                                   |
| Flack parameter                                              | -0.001(11)                                                                   |

**Table S2.** Fractional Atomic Coordinates ( $\times 10^4$ ) and Equivalent Isotropic Displacement Parameters ( $\text{\AA}^2 \times 10^3$ ) for 4-AcO-TMT iodide.  $U_{\text{eq}}$  is defined as 1/3 of the trace of the orthogonalised  $U_{\text{ij}}$  tensor.

| Atom | <i>x</i>   | <i>y</i>  | <i>z</i>  | $U(\text{eq})$ |
|------|------------|-----------|-----------|----------------|
| I1   | -2180.9(5) | 7190.0(6) | 9177.6(3) | 57.25(17)      |
| O1   | 4938(6)    | 5097(6)   | 3837(6)   | 79.2(17)       |
| O2   | 3333(6)    | 3405(4)   | 4358(4)   | 50.9(11)       |
| N1   | 216(7)     | 5704(6)   | 6865(6)   | 52.8(14)       |
| N2   | 6574(10)   | 2830(9)   | 8947(9)   | 59(2)          |
| C1   | 6074(10)   | 2824(8)   | 4002(8)   | 73(2)          |
| C2   | 4786(8)    | 3921(8)   | 4042(6)   | 50.7(17)       |
| C3   | 1979(8)    | 4315(6)   | 4448(6)   | 40.9(14)       |
| C4   | 886(9)     | 4737(7)   | 3399(6)   | 55.3(18)       |
| C5   | -528(9)    | 5571(8)   | 3499(7)   | 62(2)          |
| C6   | -881(8)    | 5947(7)   | 4607(7)   | 53.2(18)       |
| C7   | 238(7)     | 5491(6)   | 5652(6)   | 39.1(14)       |
| C8   | 1609(9)    | 5036(8)   | 7559(6)   | 58.8(19)       |
| C9   | 2567(8)    | 4401(7)   | 6830(6)   | 49.0(16)       |
| C10  | 1705(7)    | 4677(6)   | 5600(5)   | 35.2(13)       |
| C11  | 4187(10)   | 3537(10)  | 7194(7)   | 72(2)          |
| C12  | 4943(9)    | 3690(8)   | 8493(7)   | 58.8(19)       |
| C13  | 7920(10)   | 3084(10)  | 8194(8)   | 82(3)          |
| C14  | 7185(11)   | 3283(9)   | 10237(8)  | 74(2)          |
| C15  | 6173(14)   | 1350(11)  | 8941(10)  | 64(3)          |

**Table S3.** Anisotropic Displacement Parameters ( $\text{\AA}^2 \times 10^3$ ) for 4-AcO-TMT iodide. The Anisotropic displacement factor exponent takes the form:  $-2\pi^2[h^2a^{*2}U_{11}+2hka^*b^*U_{12}+\dots]$ .

| Atom | U <sub>11</sub> | U <sub>22</sub> | U <sub>33</sub> | U <sub>23</sub> | U <sub>13</sub> | U <sub>12</sub> |
|------|-----------------|-----------------|-----------------|-----------------|-----------------|-----------------|
| I1   | 53.7(2)         | 65.2(3)         | 57.1(2)         | -7.3(4)         | 21.38(16)       | -6.5(4)         |
| O1   | 46(3)           | 56(3)           | 138(5)          | 26(3)           | 23(3)           | 4(2)            |
| O2   | 56(3)           | 41(2)           | 64(3)           | 9(2)            | 30(2)           | 16(2)           |
| N1   | 47(3)           | 54(4)           | 60(4)           | -11(3)          | 18(3)           | 8(3)            |
| N2   | 40(4)           | 64(5)           | 74(5)           | 25(4)           | 13(3)           | 14(3)           |
| C1   | 66(5)           | 74(5)           | 88(6)           | 6(4)            | 34(4)           | 29(4)           |
| C2   | 42(4)           | 57(5)           | 53(4)           | 3(3)            | 9(3)            | 10(3)           |
| C3   | 40(3)           | 31(3)           | 55(4)           | 3(3)            | 18(3)           | 8(3)            |
| C4   | 63(4)           | 57(5)           | 46(4)           | -4(4)           | 12(3)           | 10(4)           |
| C5   | 53(4)           | 73(5)           | 54(5)           | 8(4)            | -3(4)           | 18(4)           |
| C6   | 37(4)           | 54(4)           | 68(5)           | 4(4)            | 8(3)            | 19(3)           |
| C7   | 31(3)           | 39(4)           | 50(4)           | -8(3)           | 13(3)           | -2(3)           |
| C8   | 53(4)           | 81(5)           | 42(4)           | -5(4)           | 6(3)            | 4(4)            |
| C9   | 37(3)           | 61(4)           | 49(4)           | 3(3)            | 10(3)           | 2(3)            |
| C10  | 31(3)           | 32(3)           | 44(4)           | 2(3)            | 11(3)           | 1(2)            |
| C11  | 56(5)           | 102(7)          | 57(5)           | -12(5)          | 6(4)            | 13(4)           |
| C12  | 46(4)           | 69(5)           | 62(5)           | 4(4)            | 11(3)           | 2(4)            |
| C13  | 46(4)           | 114(7)          | 89(6)           | 43(5)           | 22(4)           | 21(4)           |
| C14  | 69(5)           | 87(6)           | 66(5)           | 2(5)            | 13(4)           | 4(5)            |
| C15  | 69(7)           | 63(7)           | 60(6)           | 0(5)            | 9(5)            | -2(5)           |

**Table S4.** Bond Lengths for 4-AcO-TMT iodide.

| Atom | Atom | Length/ $\text{\AA}$ | Atom | Atom | Length/ $\text{\AA}$ |
|------|------|----------------------|------|------|----------------------|
| O1   | C2   | 1.186(8)             | C3   | C4   | 1.370(9)             |
| O2   | C2   | 1.353(8)             | C3   | C10  | 1.381(8)             |
| O2   | C3   | 1.405(7)             | C4   | C5   | 1.400(9)             |
| N1   | C7   | 1.364(8)             | C5   | C6   | 1.360(10)            |
| N1   | C8   | 1.375(9)             | C6   | C7   | 1.386(9)             |
| N2   | C12  | 1.535(10)            | C7   | C10  | 1.411(8)             |
| N2   | C13  | 1.487(11)            | C8   | C9   | 1.355(9)             |
| N2   | C14  | 1.487(12)            | C9   | C10  | 1.426(8)             |
| N2   | C15  | 1.485(9)             | C9   | C11  | 1.516(10)            |
| C1   | C2   | 1.483(9)             | C11  | C12  | 1.456(10)            |



**Table S5.** Bond Angles for 4-AcO-TMT iodide.

| Atom | Atom | Atom | Angle/°  | Atom | Atom | Atom | Angle/°  |
|------|------|------|----------|------|------|------|----------|
| C2   | O2   | C3   | 117.8(5) | C6   | C5   | C4   | 122.1(7) |
| C7   | N1   | C8   | 108.6(5) | C5   | C6   | C7   | 117.4(6) |
| C13  | N2   | C12  | 111.2(7) | N1   | C7   | C6   | 130.4(6) |
| C14  | N2   | C12  | 104.2(7) | N1   | C7   | C10  | 106.9(5) |
| C14  | N2   | C13  | 110.9(7) | C6   | C7   | C10  | 122.7(6) |
| C15  | N2   | C12  | 111.9(9) | C9   | C8   | N1   | 111.0(6) |
| C15  | N2   | C13  | 109.5(9) | C8   | C9   | C10  | 105.5(6) |
| C15  | N2   | C14  | 109.0(9) | C8   | C9   | C11  | 129.1(6) |
| O1   | C2   | O2   | 122.3(6) | C10  | C9   | C11  | 125.4(6) |
| O1   | C2   | C1   | 127.3(7) | C3   | C10  | C7   | 117.1(5) |
| O2   | C2   | C1   | 110.4(6) | C3   | C10  | C9   | 134.9(5) |
| C4   | C3   | O2   | 119.4(5) | C7   | C10  | C9   | 108.0(5) |
| C4   | C3   | C10  | 121.6(5) | C12  | C11  | C9   | 111.5(6) |
| C10  | C3   | O2   | 118.9(5) | C11  | C12  | N2   | 115.0(7) |
| C3   | C4   | C5   | 119.1(6) |      |      |      |          |

**Table S6.** Hydrogen Bonds for 4-AcO-TMT iodide.

| D   | H    | A               | d(D-H)/Å  | d(H-A)/Å | d(D-A)/Å  | D-H-A/° |
|-----|------|-----------------|-----------|----------|-----------|---------|
| N1  | H1   | I               | 0.867(14) | 2.98(4)  | 3.753(5)  | 150(6)  |
| C4  | H4   | I <sup>1</sup>  | 0.93      | 3.23     | 4.068(7)  | 150.5   |
| C6  | H6   | O2 <sup>2</sup> | 0.93      | 2.57     | 3.417(8)  | 152.4   |
| C12 | H12A | I <sup>3</sup>  | 0.97      | 3.02     | 3.959(8)  | 163.7   |
| C12 | H12B | I <sup>4</sup>  | 0.97      | 3.20     | 4.098(8)  | 154.7   |
| C13 | H13A | I <sup>5</sup>  | 0.96      | 3.18     | 4.085(8)  | 157.7   |
| C14 | H14B | I <sup>4</sup>  | 0.96      | 3.16     | 4.067(9)  | 157.6   |
| C14 | H14C | I <sup>5</sup>  | 0.96      | 3.13     | 3.995(8)  | 151.2   |
| C15 | H15B | O1 <sup>6</sup> | 0.96      | 2.33     | 3.274(13) | 167.7   |
| C15 | H15C | I <sup>3</sup>  | 0.96      | 3.30     | 4.165(11) | 151.2   |

<sup>1</sup> $1-x, -1/2+y, 1-z$ ; <sup>2</sup> $1-x, 1/2+y, 1-z$ ; <sup>3</sup> $1-x, -1/2+y, 2-z$ ; <sup>4</sup> $1+x, y, z$ ; <sup>5</sup> $1-x, -1/2+y, 2-z$ ; <sup>6</sup> $1-x, -1/2+y, 1-z$

**Table S7.** Torsion Angles for 4-AcO-TMT iodide.

| <b>A</b> | <b>B</b> | <b>C</b> | <b>D</b> | <b>Angle/°</b> | <b>A</b> | <b>B</b> | <b>C</b> | <b>D</b> | <b>Angle/°</b> |
|----------|----------|----------|----------|----------------|----------|----------|----------|----------|----------------|
| O2       | C3       | C4       | C5       | 175.8(6)       | C6       | C7       | C10      | C3       | -1.3(9)        |
| O2       | C3       | C10      | C7       | -174.3(5)      | C6       | C7       | C10      | C9       | 179.6(6)       |
| O2       | C3       | C10      | C9       | 4.4(10)        | C7       | N1       | C8       | C9       | 0.9(8)         |
| N1       | C7       | C10      | C3       | 179.3(5)       | C8       | N1       | C7       | C6       | 180.0(7)       |
| N1       | C7       | C10      | C9       | 0.2(7)         | C8       | N1       | C7       | C10      | -0.7(7)        |
| N1       | C8       | C9       | C10      | -0.7(8)        | C8       | C9       | C10      | C3       | -178.5(7)      |
| N1       | C8       | C9       | C11      | -179.1(7)      | C8       | C9       | C10      | C7       | 0.3(7)         |
| C2       | O2       | C3       | C4       | 79.5(8)        | C8       | C9       | C11      | C12      | -14.0(12)      |
| C2       | O2       | C3       | C10      | -105.4(6)      | C9       | C11      | C12      | N2       | 179.0(7)       |
| C3       | O2       | C2       | O1       | -0.5(10)       | C10      | C3       | C4       | C5       | 0.9(10)        |
| C3       | O2       | C2       | C1       | 179.5(6)       | C10      | C9       | C11      | C12      | 167.9(7)       |
| C3       | C4       | C5       | C6       | -1.8(11)       | C11      | C9       | C10      | C3       | 0.0(12)        |
| C4       | C3       | C10      | C7       | 0.6(9)         | C11      | C9       | C10      | C7       | 178.8(7)       |
| C4       | C3       | C10      | C9       | 179.3(7)       | C13      | N2       | C12      | C11      | 54.4(10)       |
| C4       | C5       | C6       | C7       | 1.1(11)        | C14      | N2       | C12      | C11      | 173.9(7)       |
| C5       | C6       | C7       | N1       | 179.7(7)       | C15      | N2       | C12      | C11      | -68.4(12)      |
| C5       | C6       | C7       | C10      | 0.5(10)        |          |          |          |          |                |

**Table S8.** Hydrogen Atom Coordinates ( $\text{\AA}\times 10^4$ ) and Isotropic Displacement Parameters ( $\text{\AA}^2\times 10^3$ ) for 4-AcO-TMT iodide.

| Atom | <i>x</i> | <i>y</i> | <i>z</i> | U(eq) |
|------|----------|----------|----------|-------|
| H1   | -590(70) | 6170(60) | 7120(60) | 63    |
| H1A  | 7168.02  | 3221.59  | 3929.11  | 110   |
| H1B  | 5673.21  | 2245.51  | 3306.57  | 110   |
| H1C  | 6215.02  | 2295.23  | 4743.07  | 110   |
| H4   | 1081.3   | 4473.93  | 2630.97  | 66    |
| H5   | -1249.12 | 5877.73  | 2784.92  | 74    |
| H6   | -1836.61 | 6488.32  | 4660.69  | 64    |
| H8   | 1859.68  | 5021.26  | 8413.44  | 71    |
| H11A | 3895.74  | 2587.12  | 7020.57  | 87    |
| H11B | 5034.39  | 3803.19  | 6705.99  | 87    |
| H12A | 4071.83  | 3449.01  | 8969.96  | 71    |
| H12B | 5233.97  | 4642.72  | 8653.65  | 71    |
| H13A | 9013.03  | 2723.65  | 8611.09  | 123   |
| H13B | 8029.2   | 4047.21  | 8075.92  | 123   |
| H13C | 7586.87  | 2645.41  | 7410.08  | 123   |
| H14A | 6296.95  | 3110.4   | 10705.3  | 111   |
| H14B | 7434.3   | 4241.97  | 10248.94 | 111   |
| H14C | 8217.46  | 2791.15  | 10591.33 | 111   |
| H15A | 7219.35  | 848.52   | 9240.09  | 97    |
| H15B | 5691.26  | 1065.29  | 8117.53  | 97    |
| H15C | 5349.34  | 1180.65  | 9461.79  | 97    |

### Synthetic Procedure and Characterization of 4-HO-TMT iodide

95 mg of 4-AcO-TMT iodide was dissolved in 4 mL of deionized water. 20 mL of acetic acid was added to the mixture, and it was refluxed under an atmosphere of nitrogen for 2 days. Solvent was removed *in vacuo* to obtain a green/blue oil. 3 mL of methanol and 20 mL of ethyl acetate were added to the green/blue oil, leaving a green/blue powder that was removed via filtration. Solvent was removed from the filtrate *in vacuo*. The resulting oil was dissolved in 5 mL of ethanol, and 30 mL of pentane was added to generate a precipitate. The resulting powder was isolated via filtration to give 53.1 mg (60 % yield) of an off-white powder. <sup>1</sup>H NMR (400 MHz, D<sub>2</sub>O): δ 7.19 (s, 1 H, ArH), 7.12-7.07 (m, 2 H, ArH), 6.56 (dd, *J* = 5.9, 2.5 Hz, 1 H, ArH), 3.66-3.62 (m, 2 H, CH<sub>2</sub>), 3.40-3.36 (m, 2 H, CH<sub>2</sub>), 3.20 (s, 9 H, CH<sub>3</sub>); <sup>13</sup>C NMR (100 MHz, D<sub>2</sub>O): δ 150.62 (ArC), 139.37 (ArC), 123.89 (ArC), 123.86 (ArC), 116.56 (ArC), 108.72 (ArC), 105.23 (ArC), 104.43 (ArC), 68.20 (NCH<sub>2</sub>), 53.59 (NCH<sub>3</sub>), 21.20 (CH<sub>2</sub>). Elemental analysis calcd. For C<sub>13</sub>H<sub>19</sub>N<sub>2</sub>OI: C 45.10, H 5.53, N 8.09; Found: C 44.84, H 5.23, N 7.98.

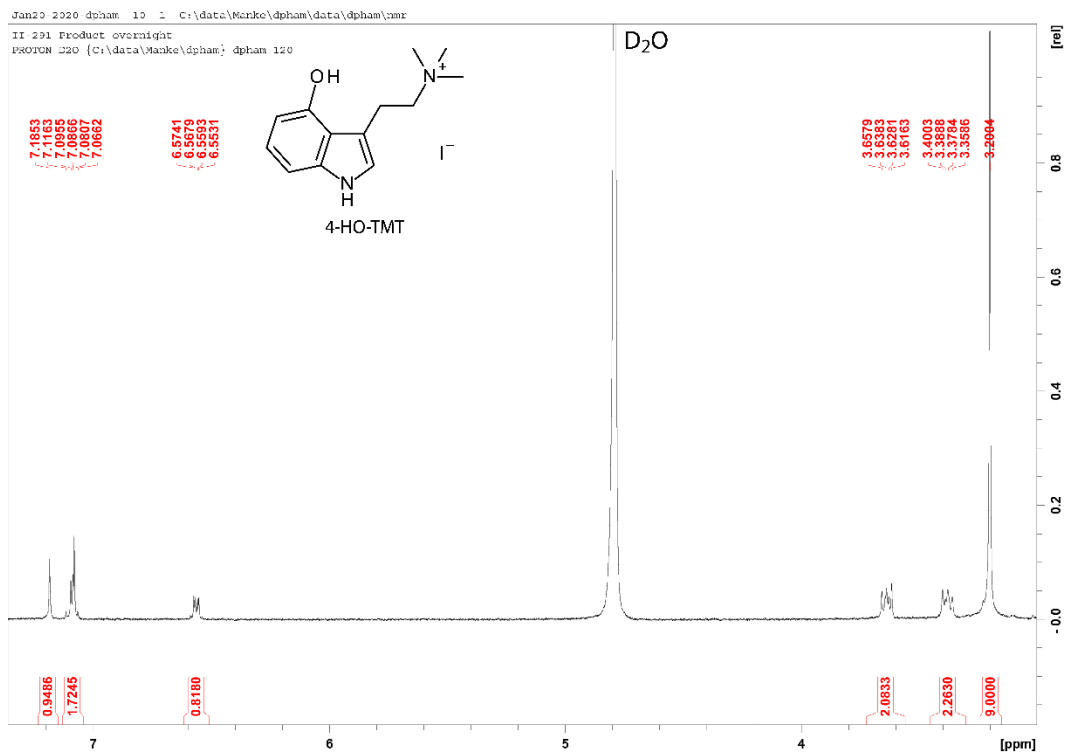

Figure S4. <sup>1</sup>H NMR of 4-HO-TMT iodide in D<sub>2</sub>O

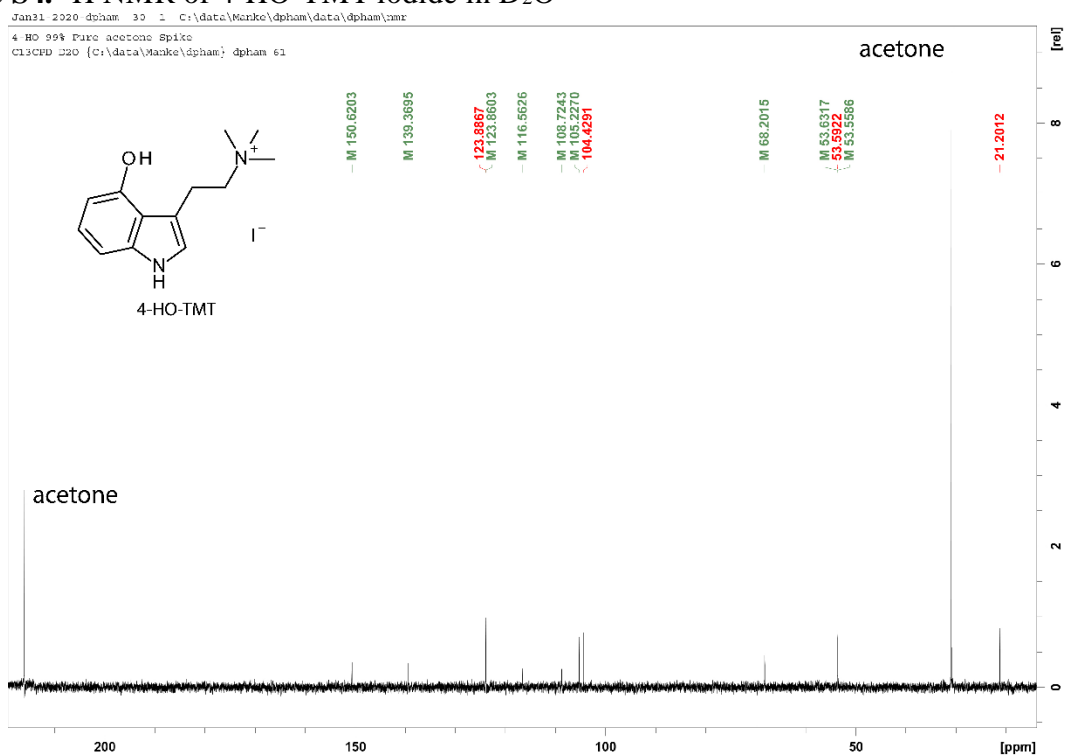

Figure S5. <sup>13</sup>C NMR of 4-HO-TMT iodide in D<sub>2</sub>O (referenced to an acetone internal standard)

**Figure S6.** Fully labelled displacement ellipsoid representation (50%) of the asymmetric unit of 4-HO-TMT iodide.

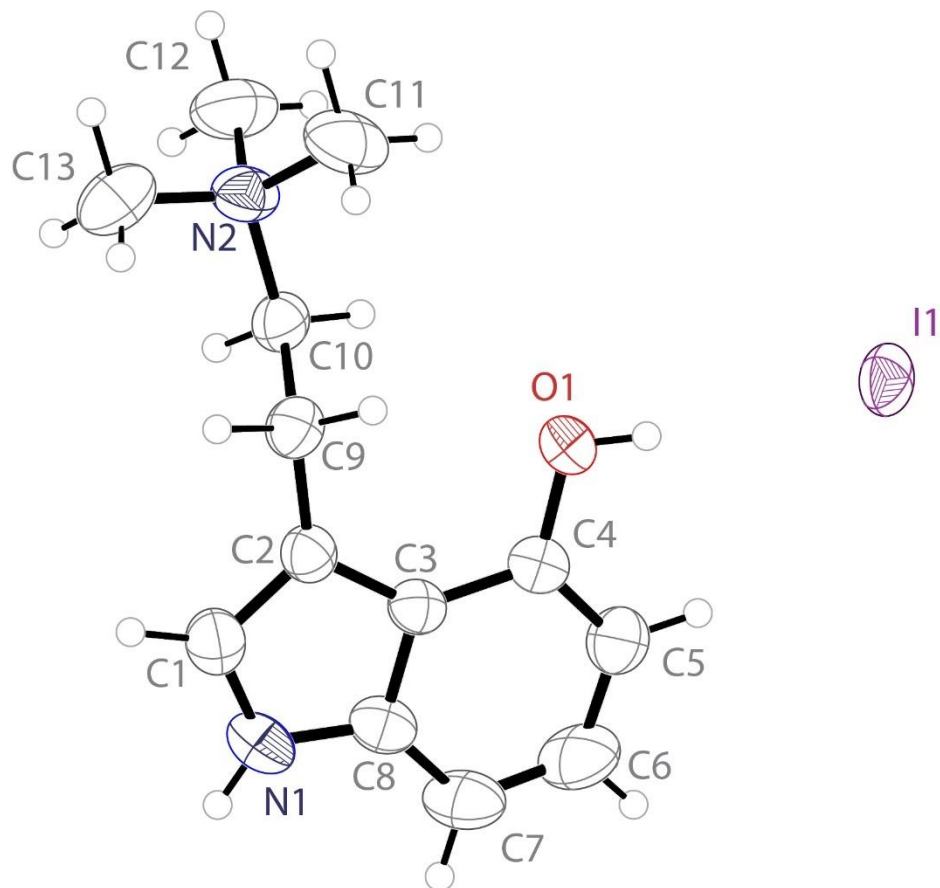

**X-Ray data collection and refinement details for 4-HO-TMT iodide.** Crystals suitable for X-ray diffraction studies were grown from the slow evaporation of an aqueous solution. All operations were performed on a Bruker D8 Venture CMOS diffractometer, using Mo K $\alpha$  radiation with a TRIUMPH monochromator at a temperature of 200 K. Data collection was carried out using the Bruker APEX3 software. Cell refinement and data reduction were performed with the SAINT program. The structure solution was done with SHELXS and structure refinement was performed with SHELXL. Further refinement and molecular graphics were generated using the OLEX2 and Mercury CSD software.

All non-hydrogen atoms were refined anisotropically (*XL*) by full matrix least squares on  $F^2$ . Hydrogen atom H1 and H1A were found from a Fourier difference map, and refined with a fixed distance of 0.86 Å and 0.85 Å respectively. Isotropic displacement parameters were set to 1.20 times  $U_{eq}$  of the parent N atom, and 1.50 times  $U_{eq}$  of the parent O atom. The remaining hydrogen atoms were placed in calculated positions and then refined with a riding model with C–H lengths of 0.95 Å ( $sp^2$ ), 0.98 Å ( $CH_2$ ) and 0.99 Å ( $CH_3$ ) with isotropic displacement parameters set to 1.20 ( $sp^2$  and  $CH_2$ ) and 1.50 ( $CH_3$ ) times  $U_{eq}$  of the parent C atom. Further details are in the tables below, and the final CIF is available as supporting material.

**Table S9.** Crystal data and structure refinement for 4-HO-TMT iodide.

|                                                              |                                                                              |
|--------------------------------------------------------------|------------------------------------------------------------------------------|
| Identification code                                          | UMD1827_0m_a                                                                 |
| Empirical formula                                            | C <sub>13</sub> H <sub>19</sub> IN <sub>2</sub> O                            |
| Formula weight                                               | 346.20                                                                       |
| Temperature/K                                                | 200.0                                                                        |
| Crystal system                                               | monoclinic                                                                   |
| Space group                                                  | <i>P</i> 2 <sub>1</sub> / <i>n</i>                                           |
| <i>a</i> /Å                                                  | 11.3057(9)                                                                   |
| <i>b</i> /Å                                                  | 11.2370(10)                                                                  |
| <i>c</i> /Å                                                  | 12.7785(10)                                                                  |
| $\alpha$ /°                                                  | 90                                                                           |
| $\beta$ /°                                                   | 113.087(2)                                                                   |
| $\gamma$ /°                                                  | 90                                                                           |
| Volume/Å <sup>3</sup>                                        | 1493.4(2)                                                                    |
| <i>Z</i>                                                     | 4                                                                            |
| $\rho_{\text{calc}}$ /cm <sup>3</sup>                        | 1.540                                                                        |
| $\mu$ /mm <sup>-1</sup>                                      | 2.133                                                                        |
| F(000)                                                       | 688.0                                                                        |
| Crystal size/mm <sup>3</sup>                                 | 0.4 × 0.2 × 0.1                                                              |
| Radiation                                                    | MoK $\alpha$ ( $\lambda$ = 0.71073)                                          |
| 2 $\Theta$ range for data collection/°                       | 6.164 to 52.884                                                              |
| Index ranges                                                 | -13 ≤ <i>h</i> ≤ 14, -14 ≤ <i>k</i> ≤ 14, -15 ≤ <i>l</i> ≤ 15                |
| Reflections collected                                        | 29269                                                                        |
| Independent reflections                                      | 3063 [ <i>R</i> <sub>int</sub> = 0.0564, <i>R</i> <sub>sigma</sub> = 0.0277] |
| Data/restraints/parameters                                   | 3063/2/161                                                                   |
| Goodness-of-fit on F <sup>2</sup>                            | 1.073                                                                        |
| Final <i>R</i> indexes [ <i>I</i> ≥ 2 $\sigma$ ( <i>I</i> )] | <i>R</i> <sub>1</sub> = 0.0368, <i>wR</i> <sub>2</sub> = 0.0797              |
| Final <i>R</i> indexes [all data]                            | <i>R</i> <sub>1</sub> = 0.0574, <i>wR</i> <sub>2</sub> = 0.0885              |
| Largest diff. peak/hole / e Å <sup>-3</sup>                  | 1.05/-0.93                                                                   |

**Table S10.** Fractional Atomic Coordinates ( $\times 10^4$ ) and Equivalent Isotropic Displacement Parameters ( $\text{\AA}^2 \times 10^3$ ) for 4-HO-TMT iodide.  $U_{\text{eq}}$  is defined as 1/3 of the trace of the orthogonalised  $U_{\text{ij}}$  tensor.

| Atom | <i>x</i>  | <i>y</i>  | <i>z</i>  | <b>U(eq)</b> |
|------|-----------|-----------|-----------|--------------|
| I1   | 2145.7(3) | 2150.1(3) | 6167.0(2) | 52.35(15)    |
| N1   | 3443(4)   | 5712(4)   | 1526(3)   | 50.9(9)      |
| N2   | 7618(4)   | 2762(3)   | 4737(3)   | 48.4(9)      |
| O1   | 3640(3)   | 3212(3)   | 4425(2)   | 45.5(7)      |
| C1   | 4692(4)   | 5503(4)   | 2233(4)   | 49.9(11)     |
| C2   | 4734(4)   | 4775(4)   | 3098(3)   | 38.5(9)      |
| C3   | 3431(4)   | 4524(4)   | 2918(3)   | 36.4(9)      |
| C4   | 2839(4)   | 3835(4)   | 3494(3)   | 41.0(9)      |
| C5   | 1520(4)   | 3802(4)   | 3097(4)   | 55.7(12)     |
| C6   | 763(5)    | 4448(5)   | 2110(5)   | 67.5(15)     |
| C7   | 1311(5)   | 5116(5)   | 1521(4)   | 58.8(13)     |
| C8   | 2640(4)   | 5138(4)   | 1929(3)   | 42.5(10)     |
| C9   | 5948(4)   | 4404(4)   | 4058(4)   | 42.9(10)     |
| C10  | 6302(4)   | 3131(4)   | 3906(3)   | 42.4(10)     |
| C11  | 7716(6)   | 2825(5)   | 5931(4)   | 72.1(16)     |
| C12  | 7832(6)   | 1499(5)   | 4459(5)   | 72.0(16)     |
| C13  | 8639(5)   | 3539(6)   | 4607(5)   | 72.0(16)     |



**Table S11.** Anisotropic Displacement Parameters ( $\text{\AA}^2 \times 10^3$ ) for 4-HO-TMT iodide. The Anisotropic displacement factor exponent takes the form:  $-2\pi^2[h^2a^*2U_{11}+2hka^*b^*U_{12}+\dots]$ .

| Atom | U <sub>11</sub> | U <sub>22</sub> | U <sub>33</sub> | U <sub>23</sub> | U <sub>13</sub> | U <sub>12</sub> |
|------|-----------------|-----------------|-----------------|-----------------|-----------------|-----------------|
| I1   | 48.1(2)         | 77.5(3)         | 37.08(18)       | -2.51(15)       | 22.74(13)       | 0.33(16)        |
| N1   | 59(2)           | 50(2)           | 39(2)           | 10.4(18)        | 14.9(18)        | 1.0(19)         |
| N2   | 55(2)           | 51(2)           | 35.2(18)        | 4.8(17)         | 14.1(16)        | 14.3(19)        |
| O1   | 47.5(17)        | 51.7(18)        | 40.0(16)        | 10.9(14)        | 20.2(13)        | 5.3(14)         |
| C1   | 48(3)           | 54(3)           | 50(3)           | 4(2)            | 22(2)           | -2(2)           |
| C2   | 42(2)           | 37(2)           | 39(2)           | -0.3(18)        | 18.0(18)        | 0.4(18)         |
| C3   | 40(2)           | 37(2)           | 29.8(19)        | -1.8(17)        | 11.4(16)        | 1.7(17)         |
| C4   | 43(2)           | 39(2)           | 40(2)           | 1.4(18)         | 14.4(19)        | 1.0(18)         |
| C5   | 40(2)           | 58(3)           | 69(3)           | 9(3)            | 21(2)           | -6(2)           |
| C6   | 37(3)           | 68(4)           | 81(4)           | 7(3)            | 5(2)            | -1(2)           |
| C7   | 49(3)           | 57(3)           | 50(3)           | 6(2)            | -2(2)           | 2(2)            |
| C8   | 47(2)           | 40(2)           | 34(2)           | -1.3(18)        | 8.1(18)         | -0.4(19)        |
| C9   | 38(2)           | 46(3)           | 45(2)           | -1(2)           | 16.6(19)        | -1.4(19)        |
| C10  | 39(2)           | 52(3)           | 37(2)           | 0.6(18)         | 15.8(18)        | 4.2(19)         |
| C11  | 101(4)          | 72(4)           | 40(3)           | 10(3)           | 24(3)           | 30(3)           |
| C12  | 82(4)           | 65(4)           | 64(3)           | 6(3)            | 24(3)           | 34(3)           |
| C13  | 36(3)           | 90(4)           | 81(4)           | 3(3)            | 13(2)           | 6(3)            |

**Table S12.** Bond Lengths for 4-HO-TMT iodide.

| Atom | Atom | Length/ $\text{\AA}$ | Atom | Atom | Length/ $\text{\AA}$ |
|------|------|----------------------|------|------|----------------------|
| N1   | C1   | 1.365(6)             | C2   | C9   | 1.497(6)             |
| N1   | C8   | 1.368(6)             | C3   | C4   | 1.406(6)             |
| N2   | C10  | 1.508(5)             | C3   | C8   | 1.410(5)             |
| N2   | C11  | 1.488(6)             | C4   | C5   | 1.374(6)             |
| N2   | C12  | 1.505(6)             | C5   | C6   | 1.416(7)             |
| N2   | C13  | 1.506(7)             | C6   | C7   | 1.371(7)             |
| O1   | C4   | 1.371(5)             | C7   | C8   | 1.384(6)             |
| C1   | C2   | 1.360(6)             | C9   | C10  | 1.519(6)             |
| C2   | C3   | 1.428(6)             |      |      |                      |

**Table S13.** Bond Angles for 4-HO-TMT iodide.

| Atom | Atom | Atom | Angle/°  | Atom | Atom | Atom | Angle/°  |
|------|------|------|----------|------|------|------|----------|
| C1   | N1   | C8   | 109.7(4) | C8   | C3   | C2   | 107.4(4) |
| C11  | N2   | C10  | 111.4(4) | O1   | C4   | C3   | 116.6(4) |
| C11  | N2   | C12  | 109.4(4) | O1   | C4   | C5   | 124.0(4) |
| C11  | N2   | C13  | 109.5(4) | C5   | C4   | C3   | 119.4(4) |
| C12  | N2   | C10  | 107.4(4) | C4   | C5   | C6   | 120.4(4) |
| C12  | N2   | C13  | 108.7(4) | C7   | C6   | C5   | 121.6(5) |
| C13  | N2   | C10  | 110.5(3) | C6   | C7   | C8   | 117.4(4) |
| C2   | C1   | N1   | 109.8(4) | N1   | C8   | C3   | 106.7(4) |
| C1   | C2   | C3   | 106.4(4) | N1   | C8   | C7   | 130.5(4) |
| C1   | C2   | C9   | 124.2(4) | C7   | C8   | C3   | 122.8(4) |
| C3   | C2   | C9   | 129.3(4) | C2   | C9   | C10  | 111.1(3) |
| C4   | C3   | C2   | 134.3(4) | N2   | C10  | C9   | 114.0(3) |
| C4   | C3   | C8   | 118.3(4) |      |      |      |          |

**Table S14.** Torsion Angles for 4-HO-TMT iodide.

| A  | B  | C   | D   | Angle/°   | A   | B  | C   | D  | Angle/°   |
|----|----|-----|-----|-----------|-----|----|-----|----|-----------|
| N1 | C1 | C2  | C3  | -0.4(5)   | C4  | C3 | C8  | N1 | -178.8(4) |
| N1 | C1 | C2  | C9  | -177.3(4) | C4  | C3 | C8  | C7 | 1.9(6)    |
| O1 | C4 | C5  | C6  | -178.2(4) | C4  | C5 | C6  | C7 | 0.2(8)    |
| C1 | N1 | C8  | C3  | -1.3(5)   | C5  | C6 | C7  | C8 | 0.0(8)    |
| C1 | N1 | C8  | C7  | 177.9(5)  | C6  | C7 | C8  | N1 | 179.8(5)  |
| C1 | C2 | C3  | C4  | 179.4(5)  | C6  | C7 | C8  | C3 | -1.1(7)   |
| C1 | C2 | C3  | C8  | -0.4(5)   | C8  | N1 | C1  | C2 | 1.1(5)    |
| C1 | C2 | C9  | C10 | -104.1(5) | C8  | C3 | C4  | O1 | 177.3(4)  |
| C2 | C3 | C4  | O1  | -2.5(7)   | C8  | C3 | C4  | C5 | -1.6(6)   |
| C2 | C3 | C4  | C5  | 178.6(5)  | C9  | C2 | C3  | C4 | -3.9(8)   |
| C2 | C3 | C8  | N1  | 1.1(5)    | C9  | C2 | C3  | C8 | 176.2(4)  |
| C2 | C3 | C8  | C7  | -178.3(4) | C11 | N2 | C10 | C9 | 61.5(5)   |
| C2 | C9 | C10 | N2  | 170.7(3)  | C12 | N2 | C10 | C9 | -178.8(4) |
| C3 | C2 | C9  | C10 | 79.8(5)   | C13 | N2 | C10 | C9 | -60.4(5)  |
| C3 | C4 | C5  | C6  | 0.6(7)    |     |    |     |    |           |

**Table S15.** Hydrogen Atom Coordinates ( $\text{\AA}\times 10^4$ ) and Isotropic Displacement Parameters ( $\text{\AA}^2\times 10^3$ ) for 4-HO-TMT iodide.

| <b>Atom</b> | <b>x</b> | <b>y</b> | <b>z</b> | <b>U(eq)</b> |
|-------------|----------|----------|----------|--------------|
| H1          | 3200(40) | 6110(40) | 900(20)  | 61           |
| H1A         | 3240(50) | 3020(40) | 4830(40) | 68           |
| H1B         | 5421.37  | 5819.48  | 2136.18  | 60           |
| H5          | 1114.54  | 3343.98  | 3486.51  | 67           |
| H6          | -147.54  | 4417.06  | 1848.53  | 81           |
| H7          | 798.29   | 5547.87  | 858.59   | 71           |
| H9A         | 5833.64  | 4474.42  | 4784.75  | 51           |
| H9B         | 6655.81  | 4942.21  | 4092.89  | 51           |
| H10A        | 5654.76  | 2589.56  | 3992.38  | 51           |
| H10B        | 6262.69  | 3034.95  | 3123.35  | 51           |
| H11A        | 7577.64  | 3647.19  | 6112.79  | 108          |
| H11B        | 7062.84  | 2308.57  | 6019.11  | 108          |
| H11C        | 8572.74  | 2560.96  | 6448.04  | 108          |
| H12A        | 7767.38  | 1456.46  | 3672.79  | 108          |
| H12B        | 8687.99  | 1235.46  | 4976.68  | 108          |
| H12C        | 7178.1   | 983.07   | 4547.74  | 108          |
| H13A        | 8574.28  | 3497.44  | 3820.28  | 108          |
| H13B        | 8515.45  | 4363.34  | 4793.01  | 108          |
| H13C        | 9489.53  | 3260.9   | 5122.83  | 108          |

## Description of Cellular Assays

Cellular assays were performed by Eurofins CEREP SA, Celle-Lévescault, France. All receptors were separately expressed in HEK-293 cells. Cell membrane homogenates (30 µg protein) are incubated for 60 min (5-HT<sub>1A</sub>, 5-HT<sub>2A</sub>, 5-HT<sub>2B</sub>) or 120 min (5-HT<sub>3</sub>) at 22°C with radiolabeled ligand in the absence or presence of the test compound in a buffer containing 50 mM Tris-HCl (pH 7.4), 5 mM MgCl<sub>2</sub>, 10 µM pargyline and 0.1% ascorbic acid. For 5-HT<sub>3</sub>, the buffer contained 50 mM Tris-HCl (pH 7.4), 5 mM MgCl<sub>2</sub>, and 1mM EDTA.

Ligands used for each receptor were:

5-HT<sub>1A</sub>: [ <sup>3</sup>H ] 8-OH-DPAT

5-HT<sub>2A</sub>: [ <sup>125</sup>I ] (±)DOI

5-HT<sub>2B</sub>: [ <sup>125</sup>I ] (±)DOI

5-HT<sub>3</sub>: [ <sup>3</sup>H ] BRL 43694

Nonspecific binding was determined in the presence of 1 µM unlabeled ligand listed above. Following incubation, the samples were filtered rapidly under vacuum through glass fiber filters (GF/B, Packard) presoaked with 0.3% PEI and rinsed several times with ice-cold 50 mM Tris-HCl using a 96-sample cell harvester (Unifilter, Packard). The filters were dried then counted for radioactivity in a scintillation counter (Topcount, Packard) using a scintillation cocktail (Microscint 0, Packard). The results are expressed as a percent inhibition of the control radioligand specific binding.

The IC<sub>50</sub> values and Hill coefficients (nH) were determined by non-linear regression analysis of the competition curves generated with mean values of duplicate data points, using Hill equation curve fitting  $Y = D + \frac{(A - D)}{1 + (C/C_{50})^{nH}}$  where Y = specific binding, A = left asymptote of the curve, D = right asymptote of the curve, C = compound concentration, C<sub>50</sub> = IC<sub>50</sub>, and nH = slope factor.

Analysis was performed using software developed at Cerep (Hill software) and validated by comparison with data generated by the commercial software SigmaPlot® 4.0 for Windows® (© 1997 by SPSS Inc.). The inhibition constants (K<sub>i</sub>) were calculated using the Cheng Prusoff equation:  $K_i = IC_{50} (1 + L/K_D)$ , where L = concentration of radioligand in the assay, and K<sub>D</sub> = affinity of the radioligand for the receptor. A scatchard plot is used to determine the K<sub>D</sub>.

## In Vitro Pharmacology: Binding Assays

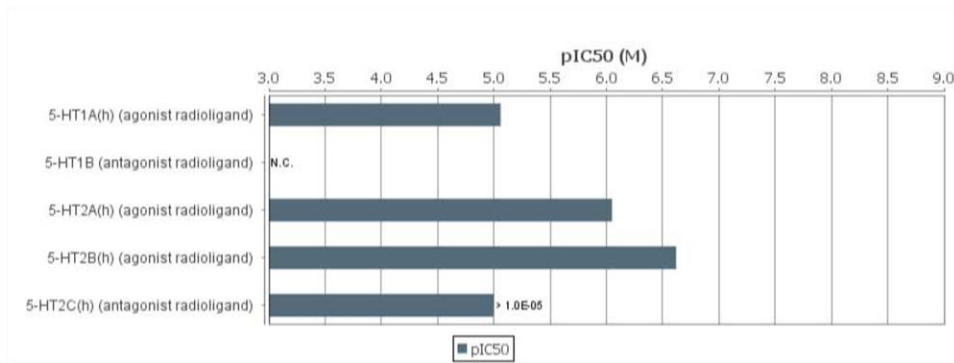

**Figure S7.** Histogram for 4-HO-TMT iodide.

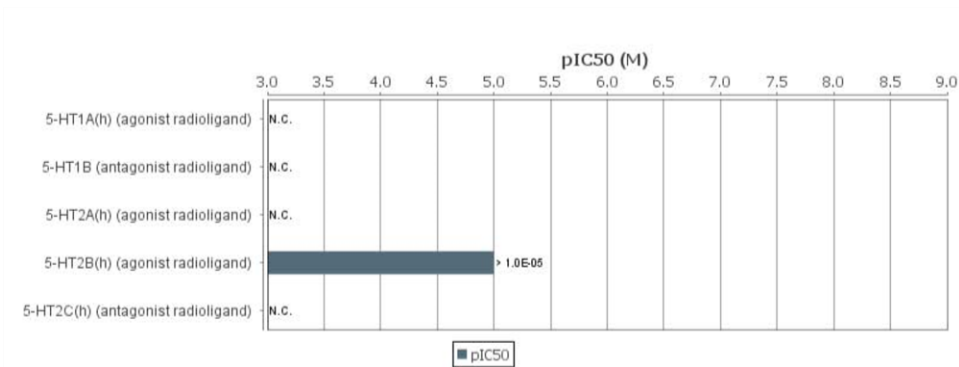

**Figure S8.** Histogram for 4-AcO-TMT iodide.

| Compound I.D.                                     | Client Compound I.D. | IC <sub>50</sub> (M) | K <sub>i</sub> (M) | nH  | Test Concentration | % Inhibition of Control Specific Binding |                 |       | Flags           |                 |
|---------------------------------------------------|----------------------|----------------------|--------------------|-----|--------------------|------------------------------------------|-----------------|-------|-----------------|-----------------|
|                                                   |                      |                      |                    |     |                    | 1 <sup>st</sup>                          | 2 <sup>nd</sup> | Mean  | 1 <sup>st</sup> | 2 <sup>nd</sup> |
| <b>5-HT<sub>1A</sub>(h) (agonist radioligand)</b> |                      |                      |                    |     |                    |                                          |                 |       |                 |                 |
| 100051748-1                                       | CT2001PR01           | N.C.                 | n/a                | n/a | 3.0E-09 M          | -11.2                                    | 15.9            | 2.4   |                 |                 |
|                                                   |                      |                      |                    |     | 1.0E-08 M          | -19.8                                    | 33.4            | 6.8   |                 |                 |
|                                                   |                      |                      |                    |     | 3.0E-08 M          | -27.6                                    | 22.7            | -2.5  |                 |                 |
|                                                   |                      |                      |                    |     | 1.0E-07 M          | -13.3                                    | -10.9           | -12.1 |                 |                 |
|                                                   |                      |                      |                    |     | 3.0E-07 M          | 1.1                                      | 20.3            | 10.7  |                 |                 |
|                                                   |                      |                      |                    |     | 1.0E-06 M          | -21.2                                    | 15.1            | -3.0  |                 |                 |
|                                                   |                      |                      |                    |     | 3.0E-06 M          | 15.6                                     | -18.2           | -1.3  |                 |                 |
|                                                   |                      |                      |                    |     | 1.0E-05 M          | -0.1                                     | 20.1            | 10.0  |                 |                 |

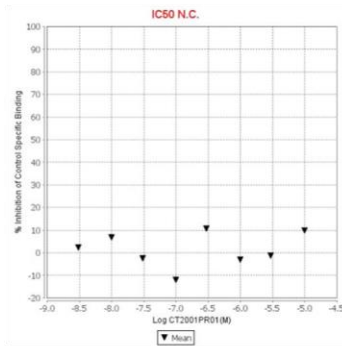

Figure S9. 4-AcO-TMT iodide on 5-HT<sub>1A</sub> (agonist radioligand)

|             |            |           |           |     |           |       |       |       |  |    |
|-------------|------------|-----------|-----------|-----|-----------|-------|-------|-------|--|----|
| 100051748-2 | CT2001AM01 | 8.8E-06 M | 4.4E-06 M | 1.8 | 3.0E-09 M | 14.8  | -10.5 | 2.2   |  |    |
|             |            |           |           |     | 1.0E-08 M | -6.6  | -11.1 | -8.9  |  |    |
|             |            |           |           |     | 3.0E-08 M | 19.5  | -13.6 | 2.9   |  |    |
|             |            |           |           |     | 1.0E-07 M | -5.2  | 35.8  | -5.2  |  | {} |
|             |            |           |           |     | 3.0E-07 M | -11.0 | -0.7  | -5.9  |  |    |
|             |            |           |           |     | 1.0E-06 M | -30.1 | -4.2  | -17.2 |  |    |
|             |            |           |           |     | 3.0E-06 M | 22.5  | 3.9   | 13.2  |  |    |
|             |            |           |           |     | 1.0E-05 M | 59.3  | 45.7  | 52.5  |  |    |

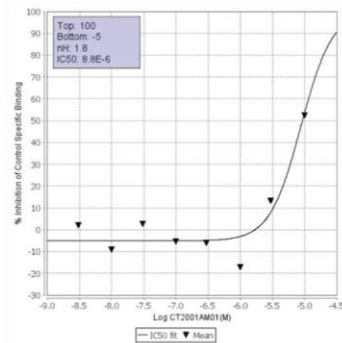

Figure S10. 4-HO-TMT iodide on 5-HT<sub>1A</sub> (agonist radioligand)

| Compound I.D.                                     | Client Compound I.D. | IC <sub>50</sub> (M) | K <sub>i</sub> (M) | nH  | Test Concentration | % Inhibition of Control Specific Binding |                 |      | Flags           |                 |
|---------------------------------------------------|----------------------|----------------------|--------------------|-----|--------------------|------------------------------------------|-----------------|------|-----------------|-----------------|
|                                                   |                      |                      |                    |     |                    | 1 <sup>st</sup>                          | 2 <sup>nd</sup> | Mean | 1 <sup>st</sup> | 2 <sup>nd</sup> |
| <b>5-HT<sub>1B</sub> (antagonist radioligand)</b> |                      |                      |                    |     |                    |                                          |                 |      |                 |                 |
| 100051748-1                                       | CT2001PR01           | N.C.                 | n/a                | n/a | 3.0E-09 M          | -7.3                                     | -11.1           | -9.2 |                 |                 |
|                                                   |                      |                      |                    |     | 1.0E-08 M          | -9.2                                     | 1.5             | -3.9 |                 |                 |
|                                                   |                      |                      |                    |     | 3.0E-08 M          | 6.7                                      | -11.3           | -2.3 |                 |                 |
|                                                   |                      |                      |                    |     | 1.0E-07 M          | 0.4                                      | 5.3             | 2.8  |                 |                 |
|                                                   |                      |                      |                    |     | 3.0E-07 M          | 9.5                                      | 10.5            | 10.0 |                 |                 |
|                                                   |                      |                      |                    |     | 1.0E-06 M          | -4.2                                     | 6.9             | 1.3  |                 |                 |
|                                                   |                      |                      |                    |     | 3.0E-06 M          | 9.1                                      | 3.0             | 6.0  |                 |                 |
|                                                   |                      |                      |                    |     | 1.0E-05 M          | -1.8                                     | 9.3             | 3.8  |                 |                 |

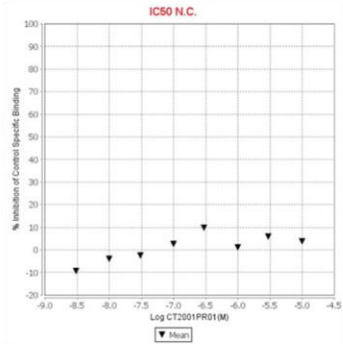

Figure S11. 4-AcO-TMT iodide on 5-HT<sub>1B</sub> (antagonist radioligand)

|             |            |      |     |     |           |      |       |      |  |  |
|-------------|------------|------|-----|-----|-----------|------|-------|------|--|--|
| 100051748-2 | CT2001AM01 | N.C. | n/a | n/a | 3.0E-09 M | 0.6  | -3.7  | -1.5 |  |  |
|             |            |      |     |     | 1.0E-08 M | 11.8 | -0.6  | 5.6  |  |  |
|             |            |      |     |     | 3.0E-08 M | 6.1  | -11.0 | -2.4 |  |  |
|             |            |      |     |     | 1.0E-07 M | 2.0  | 12.8  | 7.4  |  |  |
|             |            |      |     |     | 3.0E-07 M | 0.4  | -4.5  | -2.0 |  |  |
|             |            |      |     |     | 1.0E-06 M | 12.3 | -6.1  | 3.1  |  |  |
|             |            |      |     |     | 3.0E-06 M | -3.8 | -3.7  | -3.7 |  |  |
|             |            |      |     |     | 1.0E-05 M | 22.4 | 19.6  | 21.0 |  |  |

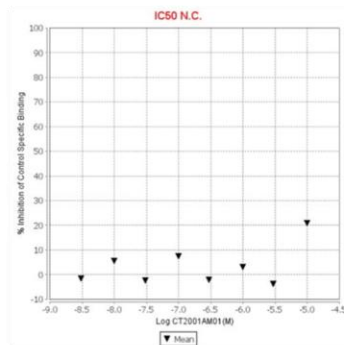

Figure S12. 4-HO-TMT iodide on 5-HT<sub>1B</sub> (antagonist radioligand)

| Compound I.D.                                     | Client Compound I.D. | IC <sub>50</sub> (M) | K <sub>i</sub> (M) | nH  | Test Concentration | % Inhibition of Control Specific Binding |                 |       | Flags           |                 |
|---------------------------------------------------|----------------------|----------------------|--------------------|-----|--------------------|------------------------------------------|-----------------|-------|-----------------|-----------------|
|                                                   |                      |                      |                    |     |                    | 1 <sup>st</sup>                          | 2 <sup>nd</sup> | Mean  | 1 <sup>st</sup> | 2 <sup>nd</sup> |
| <b>5-HT<sub>2A</sub>(h) (agonist radioligand)</b> |                      |                      |                    |     |                    |                                          |                 |       |                 |                 |
| 100051748-1                                       | CT2001PR01           | N.C.                 | n/a                | n/a | 3.0E-09 M          | -15.3                                    | -7.7            | -11.5 |                 |                 |
|                                                   |                      |                      |                    |     | 1.0E-08 M          | -0.8                                     | -11.3           | -6.1  |                 |                 |
|                                                   |                      |                      |                    |     | 3.0E-08 M          | -7.0                                     | -3.6            | -5.3  |                 |                 |
|                                                   |                      |                      |                    |     | 1.0E-07 M          | 0.2                                      | -26.6           | -13.2 |                 |                 |
|                                                   |                      |                      |                    |     | 3.0E-07 M          | 7.0                                      | 2.3             | 4.7   |                 |                 |
|                                                   |                      |                      |                    |     | 1.0E-06 M          | -7.4                                     | 1.8             | -2.8  |                 |                 |
|                                                   |                      |                      |                    |     | 3.0E-06 M          | 3.5                                      | -3.5            | 0.0   |                 |                 |
|                                                   |                      |                      |                    |     | 1.0E-05 M          | 16.3                                     | 3.7             | 10.0  |                 |                 |

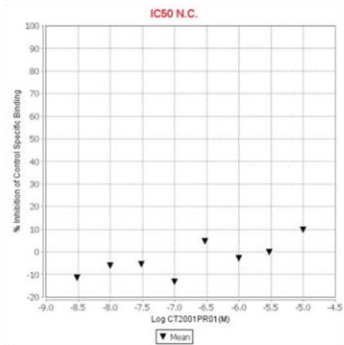

Figure S13. 4-AcO-TMT iodide on 5-HT<sub>2A</sub> (agonist radioligand)

|             |            |           |           |     |           |       |       |       |  |  |
|-------------|------------|-----------|-----------|-----|-----------|-------|-------|-------|--|--|
| 100051748-2 | CT2001AM01 | 9.0E-07 M | 6.7E-07 M | 0.6 | 3.0E-09 M | -10.3 | -12.0 | -11.2 |  |  |
|             |            |           |           |     | 1.0E-08 M | -2.7  | -10.3 | -6.5  |  |  |
|             |            |           |           |     | 3.0E-08 M | 13.7  | -5.9  | 3.9   |  |  |
|             |            |           |           |     | 1.0E-07 M | 17.4  | 19.4  | 18.4  |  |  |
|             |            |           |           |     | 3.0E-07 M | 18.4  | 15.4  | 16.9  |  |  |
|             |            |           |           |     | 1.0E-06 M | 45.8  | 49.4  | 47.6  |  |  |
|             |            |           |           |     | 3.0E-06 M | 65.1  | 59.1  | 62.1  |  |  |
|             |            |           |           |     | 1.0E-05 M | 79.0  | 79.1  | 79.0  |  |  |

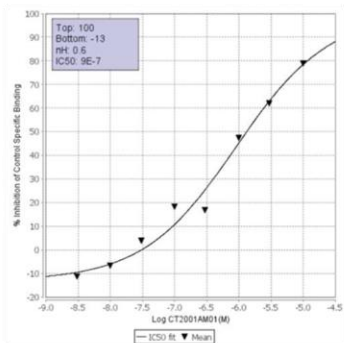

Figure S14. 4-HO-TMT iodide on 5-HT<sub>2A</sub> (agonist radioligand)



| Compound I.D.                                     | Client Compound I.D. | IC <sub>50</sub> (M) | K <sub>i</sub> (M) | nH  | Test Concentration | % Inhibition of Control Specific Binding |                 |      | Flags           |                 |
|---------------------------------------------------|----------------------|----------------------|--------------------|-----|--------------------|------------------------------------------|-----------------|------|-----------------|-----------------|
|                                                   |                      |                      |                    |     |                    | 1 <sup>st</sup>                          | 2 <sup>nd</sup> | Mean | 1 <sup>st</sup> | 2 <sup>nd</sup> |
| <b>5-HT<sub>2B</sub>(h) (agonist radioligand)</b> |                      |                      |                    |     |                    |                                          |                 |      |                 |                 |
| 100051748-1                                       | CT2001PR01           | > 1.0E-05            | n/a                | n/a | 3.0E-09 M          | 8.6                                      | -1.5            | 3.6  |                 |                 |
|                                                   |                      |                      |                    |     | 1.0E-08 M          | 1.6                                      | -13.0           | -5.7 |                 |                 |
|                                                   |                      |                      |                    |     | 3.0E-08 M          | 8.0                                      | 1.0             | 4.5  |                 |                 |
|                                                   |                      |                      |                    |     | 1.0E-07 M          | 11.0                                     | -5.2            | 2.9  |                 |                 |
|                                                   |                      |                      |                    |     | 3.0E-07 M          | 12.3                                     | -1.0            | 5.6  |                 |                 |
|                                                   |                      |                      |                    |     | 1.0E-06 M          | 13.7                                     | 6.7             | 10.2 |                 |                 |
|                                                   |                      |                      |                    |     | 3.0E-06 M          | 28.7                                     | 20.0            | 24.3 |                 |                 |
|                                                   |                      |                      |                    |     | 1.0E-05 M          | 45.5                                     | 47.4            | 46.5 |                 |                 |

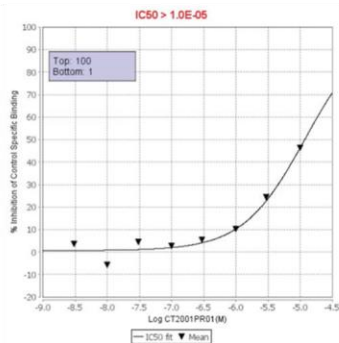

Figure S15. 4-AcO-TMT iodide on 5-HT<sub>2B</sub> (agonist radioligand)

|             |            |           |           |     |           |      |      |      |  |  |
|-------------|------------|-----------|-----------|-----|-----------|------|------|------|--|--|
| 100051748-2 | CT2001AM01 | 2.4E-07 M | 1.2E-07 M | 1.1 | 3.0E-09 M | -3.5 | -7.9 | -5.7 |  |  |
|             |            |           |           |     | 1.0E-08 M | 3.6  | 1.0  | 2.3  |  |  |
|             |            |           |           |     | 3.0E-08 M | 17.4 | -1.5 | 7.9  |  |  |
|             |            |           |           |     | 1.0E-07 M | 26.9 | 14.2 | 20.6 |  |  |
|             |            |           |           |     | 3.0E-07 M | 53.9 | 50.7 | 52.3 |  |  |
|             |            |           |           |     | 1.0E-06 M | 77.9 | 74.2 | 76.0 |  |  |
|             |            |           |           |     | 3.0E-06 M | 89.2 | 89.1 | 89.1 |  |  |
|             |            |           |           |     | 1.0E-05 M | 88.2 | 91.9 | 90.1 |  |  |

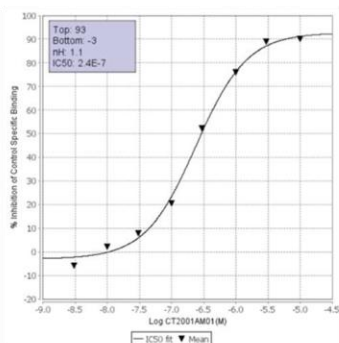

Figure S16. 4-HO-TMT iodide on 5-HT<sub>2B</sub> (agonist radioligand)

| Compound I.D.                                        | Client Compound I.D. | IC <sub>50</sub> (M) | K <sub>i</sub> (M) | nH  | Test Concentration | % Inhibition of Control Specific Binding |                 |      | Flags           |                 |
|------------------------------------------------------|----------------------|----------------------|--------------------|-----|--------------------|------------------------------------------|-----------------|------|-----------------|-----------------|
|                                                      |                      |                      |                    |     |                    | 1 <sup>st</sup>                          | 2 <sup>nd</sup> | Mean | 1 <sup>st</sup> | 2 <sup>nd</sup> |
| <b>5-HT<sub>2C</sub>(h) (antagonist radioligand)</b> |                      |                      |                    |     |                    |                                          |                 |      |                 |                 |
| 100051748-1                                          | CT2001PR01           | N.C.                 | n/a                | n/a | 3.0E-09 M          | -6.0                                     | 19.4            | 6.7  |                 |                 |
|                                                      |                      |                      |                    |     | 1.0E-08 M          | 4.3                                      | 12.5            | 8.4  |                 |                 |
|                                                      |                      |                      |                    |     | 3.0E-08 M          | 7.3                                      | 4.0             | 5.6  |                 |                 |
|                                                      |                      |                      |                    |     | 1.0E-07 M          | 1.7                                      | -0.5            | 0.6  |                 |                 |
|                                                      |                      |                      |                    |     | 3.0E-07 M          | -4.5                                     | -2.9            | -3.7 |                 |                 |
|                                                      |                      |                      |                    |     | 1.0E-06 M          | 1.2                                      | 6.9             | 4.1  |                 |                 |
|                                                      |                      |                      |                    |     | 3.0E-06 M          | 1.7                                      | 7.8             | 4.8  |                 |                 |
|                                                      |                      |                      |                    |     | 1.0E-05 M          | 13.7                                     | 20.7            | 17.2 |                 |                 |

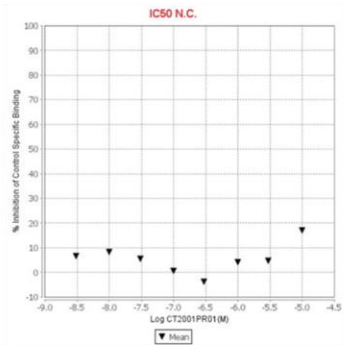

Figure S17. 4-AcO-TMT iodide on 5-HT<sub>3</sub> (antagonist radioligand)

|             |            |           |     |     |           |      |      |      |  |  |
|-------------|------------|-----------|-----|-----|-----------|------|------|------|--|--|
| 100051748-2 | CT2001AM01 | > 1.0E-05 | n/a | n/a | 3.0E-09 M | 2.6  | 26.1 | 14.4 |  |  |
|             |            |           |     |     | 1.0E-08 M | 5.1  | 5.8  | 5.5  |  |  |
|             |            |           |     |     | 3.0E-08 M | 9.4  | 9.4  | 9.4  |  |  |
|             |            |           |     |     | 1.0E-07 M | 1.6  | 5.1  | 3.3  |  |  |
|             |            |           |     |     | 3.0E-07 M | 3.5  | 12.6 | 8.1  |  |  |
|             |            |           |     |     | 1.0E-06 M | 19.2 | 23.0 | 21.1 |  |  |
|             |            |           |     |     | 3.0E-06 M | 25.3 | 25.4 | 25.3 |  |  |
|             |            |           |     |     | 1.0E-05 M | 50.5 | 53.1 | 51.8 |  |  |

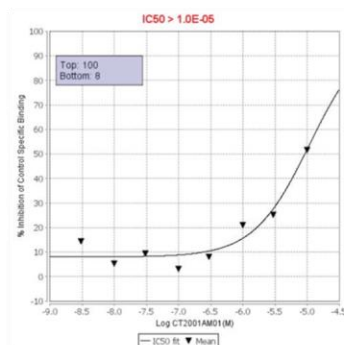

Figure S18. 4-HO-TMT iodide on 5-HT<sub>3</sub> (antagonist radioligand)

## References

1. Bruker (2018) *APEX3*, *SAINTE* and *SADABS*. Bruker AXS Inc., Madison, Wisconsin, USA.
2. Sheldrick, G. M. *SHELXT*: Integrating space-group and crystal-structure determination. *Acta Cryst.* 2015, **A71**, 3-8.
3. Sheldrick, G. M. Crystal structure refinement with *SHELXL*. *Acta Cryst.* 2015, **C71**, 3-8.
4. Dolomanov, O. V.; Bourhis, L. J.; Gildea, R. J.; Howard, J. A. K.; Puschmann, H. *OLEX2*: a complete structure solution, refinement and analysis program. *J. Appl. Cryst.* 2009, **42**, 339-341.
5. Macrae, C. F.; Sovago, I.; Cottrell, S. J.; Galek, P. T. A.; McCabe, P.; Pidcock, E.; Platings, M.; Shields, G. P.; Stevens, J. S.; Towler, M.; Wood, P. A. *Mercury 4.0*: from visualization to analysis, design and prediction. *J. Appl. Cryst.*, 2020, **53**, 226-235.
